# Supplementary material for: CsPbBr3 perovskite quantum dot decorated ZIF-8 MOF: a selective dual recognition fluorometric visual probe for 4-nitroaniline and rhodamine blue
Source: Royal Society of Chemistry journal article supplement (doi:10.1039/d3ay01458d), 2023-01-01
Supplement: d3ay01458d1.pdf [file d3ay01458d1.pdf]

Supporting info

**CsPbBr<sub>3</sub> perovskite quantum dot integrated ZIF-8 MOF: A selective dual recognition fluorometric visual probe for 4 – nitroaniline and rhodamine blue**

Shahnaz Ahmed<sup>a</sup>, Dambarudhar Mohanta<sup>b</sup>, Kankana Baruah<sup>a</sup> and Swapan Kumar Dolui<sup>a\*</sup>

a. Department of Chemical Sciences, Tezpur University, Napaam, Tezpur, Assam, 784028, India.

b. Department of Physics, Tezpur University, Napaam, Tezpur, Assam, 784028, India.

List of contents in Supporting Information:

1. Sample preparation and sensing measurement
2. Preparation of paper sensor
3. Sample preparation for real sample analysis
4. Photoluminescence quantum yield determination

**Figure S1:** EDX spectra of ZIF-8 MOF (a), CsPbBr<sub>3</sub>/ZIF-8 (b).

**Figure S2:** SEM image of ZIF-8 MOF.

**Figure S3:** High resolution XPS spectra of Pb 4f in CsPbBr<sub>3</sub> (black), CsPbBr<sub>3</sub>/ZIF-8 (red).

**Figure S4:** PL emission response of CPB/ZIF-8 with various concentration of nitrobenzene.

**Figure S5:** Relative PL intensity versus time plot with 4-nitroaniline addition for 1200 sec incubation period (FL response time study) (a), PL emission of CPB/ZIF-8 with different volume of methanol addition (b).

**Figure S6:** Concentration optimization study of the sensor with 4-NA (a), and RhB (b).

**Figure S7:** PL response of CsPbBr<sub>3</sub>@ZIF-8 in different pH (a), sensing experiment with 4-NA (b) and RhB (c) in different pH.

**Figure S8:** p-XRD analysis of CPB/ZIF-8 after 4-NA addition (a), Interference study of 4-NA sensing with different metal ions (b).

**Figure S9:** PL response of CPB/ZIF-8 with o-NA (a), Stern-Volmer plot (b).

**Figure S10:** PL response of CPB@ZIF-8 with 2,4 DNA (a), Stern-Volmer plot (b).

**Figure S11:** PL response of CPB@ZIF-8 with PA (a), Stern-Volmer plot (b).

**Figure S12:** PL response of CPB@ZIF-8 with m- NA (a), Stern-Volmer plot (b).

**Figure S13:** FTIR spectra of 4-NA (blue), CPB@ZIF-8 (Red) and CPB@ZIF-8 with 4-NA (black).

**Figure S14:** Selectivity study of CsPbBr<sub>3</sub>@ZIF-8 sensor for RhB.

**Table S1:** Chemical stability study of CPB/ZIF-8 in different solvents.

**Table S2:** Comparison of performance of CPB/ZIF-8 with previous literatures for 4-nitroaniline detection.

**Table S3:** Comparison of quenching constant (K<sub>sv</sub>), LOD and, correlation values of different NACs analytes.

**1. Sample preparation and sensing measurement:** For nitroaniline sensing 5 mg ml<sup>-1</sup> CsPbBr<sub>3</sub>@ZIF-8 composite was dispersed in methanol and sonicated for 10 min to become homogeneous. Then the PL emission was measured using the 3 ml dispersion of composite. Separately, different concentration of nitroanilines (0 - 64 μM) are prepared in methanol by diluting a stock solution of 1mM. Thereafter, for sensing experiment 100 μl of different concentrations of analyte (0–64 μM) were continuously added into CsPbBr<sub>3</sub>@ZIF-8 standard and incubating at room temperature for 60 sec. Using a 1cm<sup>3</sup> quartz cuvette, the PL emission spectra of the solutions were measured at an excitation wavelength of 365 nm and an slit width of 10 nm.

For the detection of RhB dye, first a 0.1 mM aqueous stock solution was prepared and then diluted to various concentrations. Once the RhB solution was ready, 100 μl of the solution was added to 3 ml of CsPbBr<sub>3</sub>@ZIF-8 dispersion and the mixture was homogenized. The PL spectra were obtained at an excitation wavelength of 365 nm following an incubation period of 2 minutes at room temperature.

**2. Preparation of paper sensor:** To prepare a paper sensor for the purpose of studying the visual detection of analytes by the CsPbBr<sub>3</sub>@ZIF-8, square size (1.5 cm×1.5cm) cellulose filter papers were used. Thereafter, the paper strips were dripped into 5 ml of 1.5 mg/ml CPB@ZIF-8 dispersion for 30 min. After room temperature drying process, 4-NA of concentration 0-10μM was dropped

into the test strips, forming a simple and low cost visual sensing platform. Similar procedure was followed for RhB dye paper sensor preparation.

**3. Sample preparation for real sample analysis:** For the analysis of 4-NA in soil samples, 13.8 mg of 4-NA were first added to 2.0 g of soil sample and mixed the content using a mortar pestle. Then, 100 mL of methanol was added and ultrasonicate the mixture for 30 min. Following the centrifugation of the mixture for 5 min at 5000 rpm, supernatant was collected which was then diluted to prepare different known concentration of 4-NA. Then 4 ml of CsPbBr<sub>3</sub>@ZIF-8 dispersion was mixed with the prepared soil samples and fluorescence measurements were performed under the excitation wavelength of 365 nm. Similarly different known concentrations (0, 0.5, 5 and 10 μM) of 4-NA were added to tap water sample and then fluorescence measurements were carried out using 4 ml of CsPbBr<sub>3</sub>@ZIF-8 dispersion.

Similarly real sample analysis of the sensor for RhB, fruit juice samples were first centrifuged and the supernatants were collected. Then the supernatant solutions were diluted to 100-fold dilution with distilled water and mixed with various concentrations of RhB for fluorescence measurements.

**4. Photoluminescence quantum yield determination:** The relative PLQY measurement was performed using fluorescein as a reference standard (QY = 0.95 in 0.1 M NaOH) using the formula as follows-

$$QY_S = QY_F \times I_S/I_F \times A_F/A_S \times \eta_s^2/\eta_F^2 \quad (1)$$

Where, QY = quantum yield of the sample.

A = Absorbance at the excitation wavelength.

I = Integrated emission intensity

η = Refractive index (1.375 for hexane, 1.33 for 0.1 M NaOH)

The subscript 'S' stands for sample and F means Fluorescein (reference standard). We have prepared five different solutions of fluorescein dye and CsPbBr<sub>3</sub>@MOF composite with sufficient dilution having absorbance below 0.1 and calculated the QY according to the above mentioned equation. [1]

Figure S1

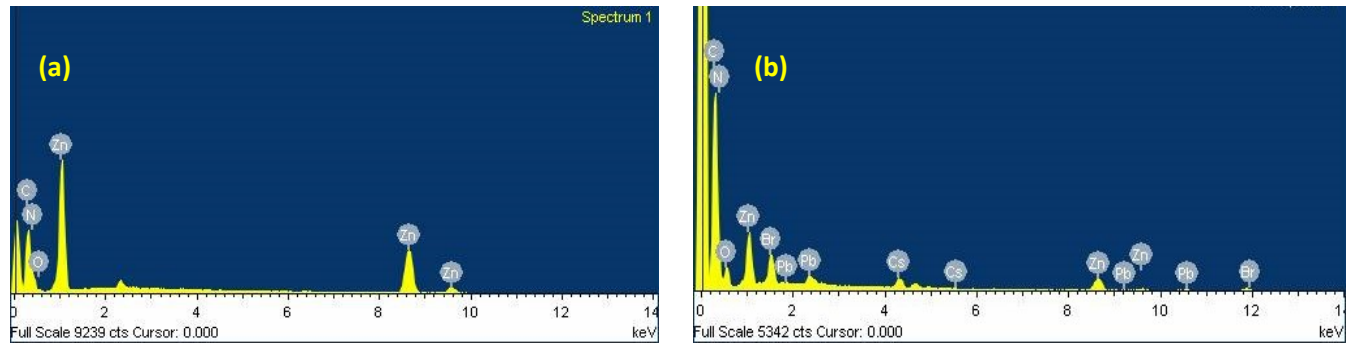

Figure S2

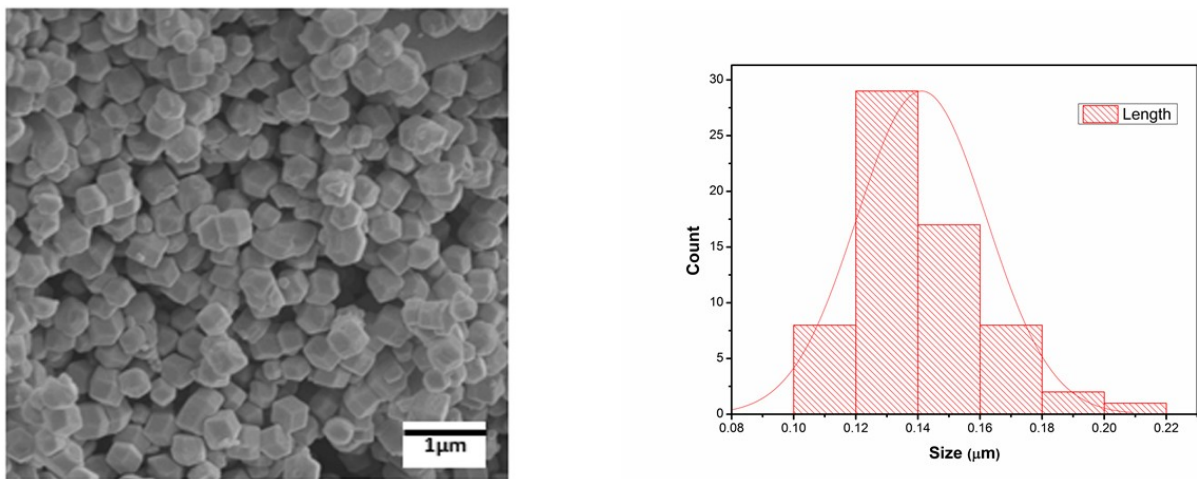

Figure S3

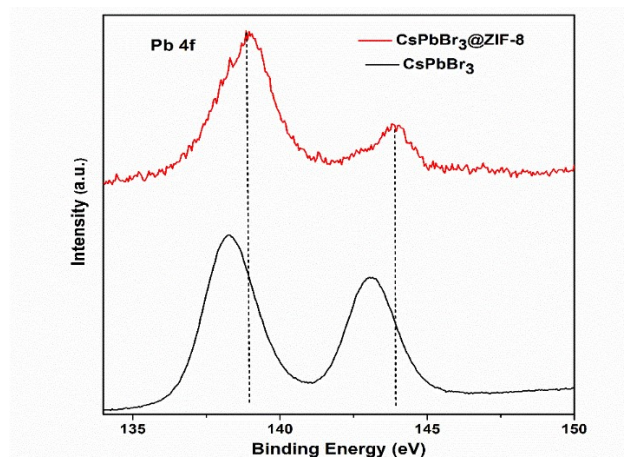

Figure S4

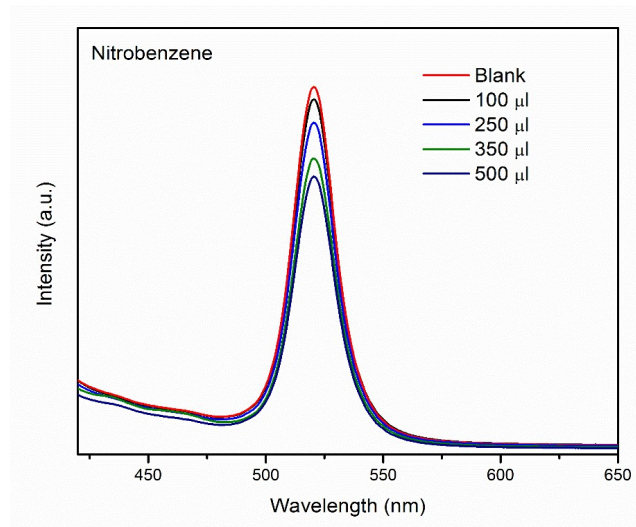

Figure S5

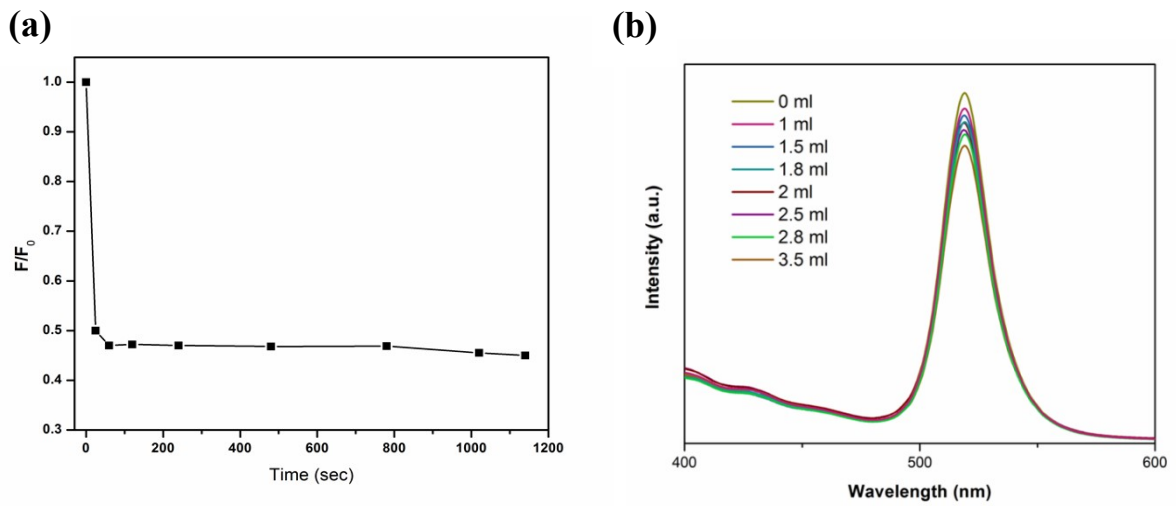

Figure S6

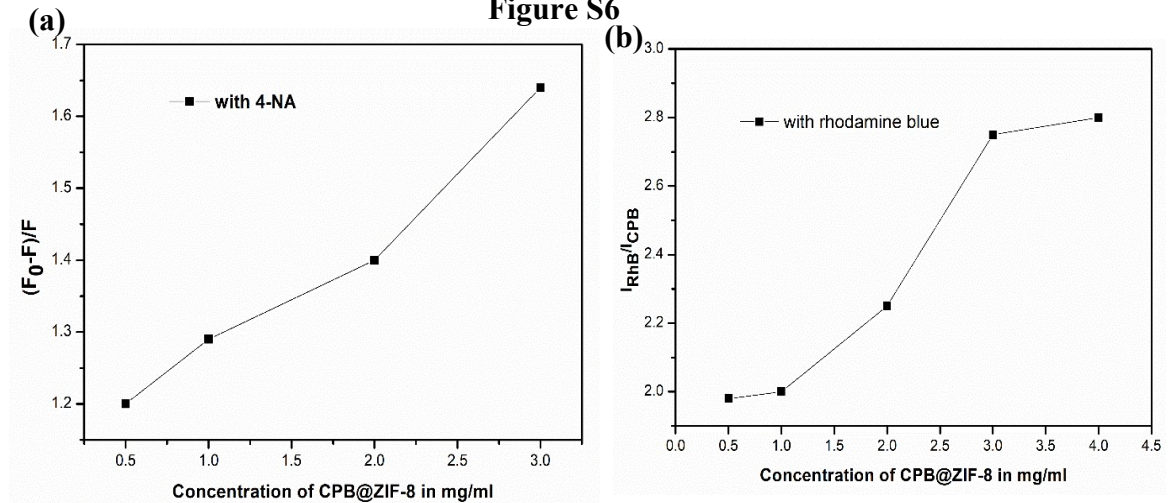

Figure S7

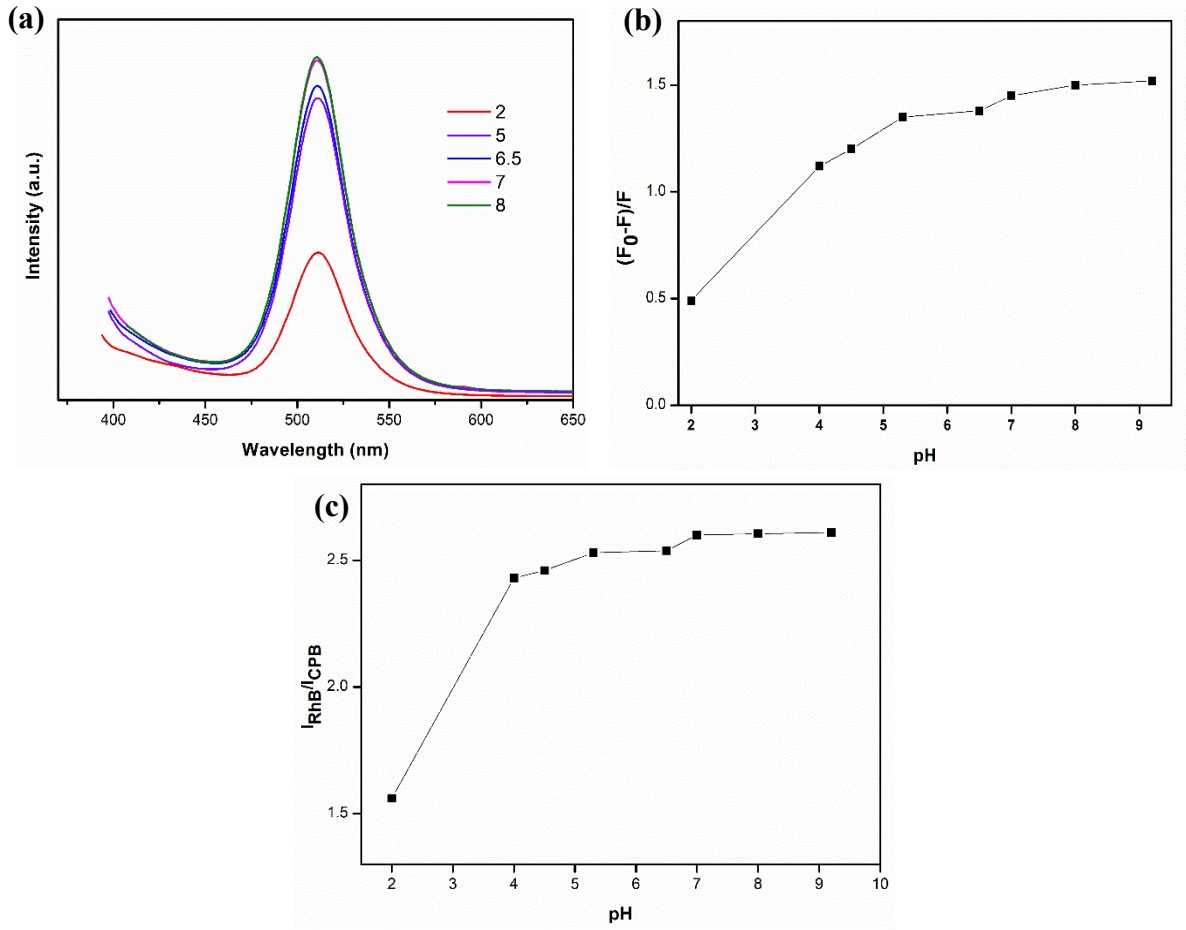

Figure S8

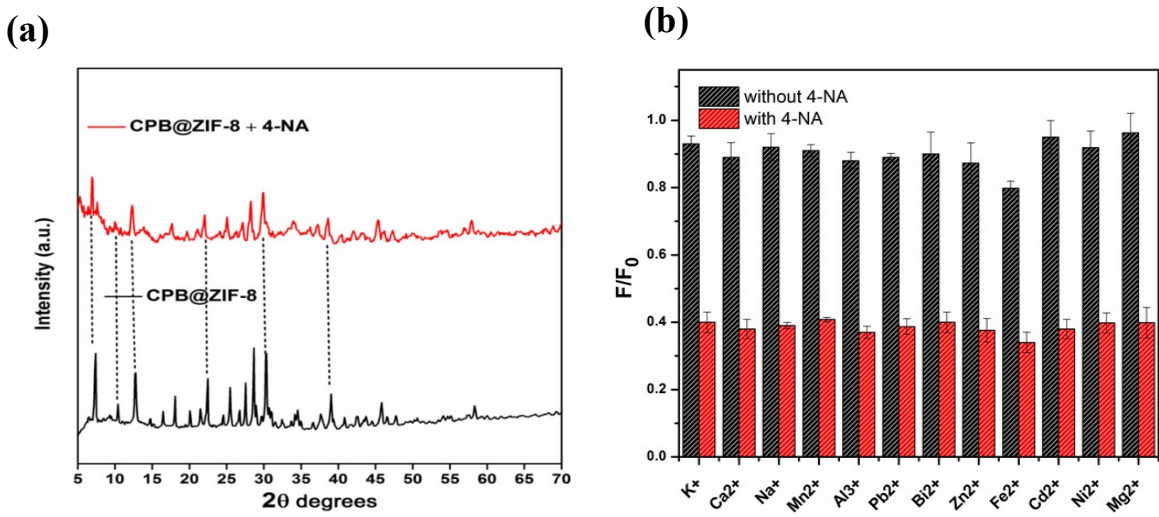



Figure S9

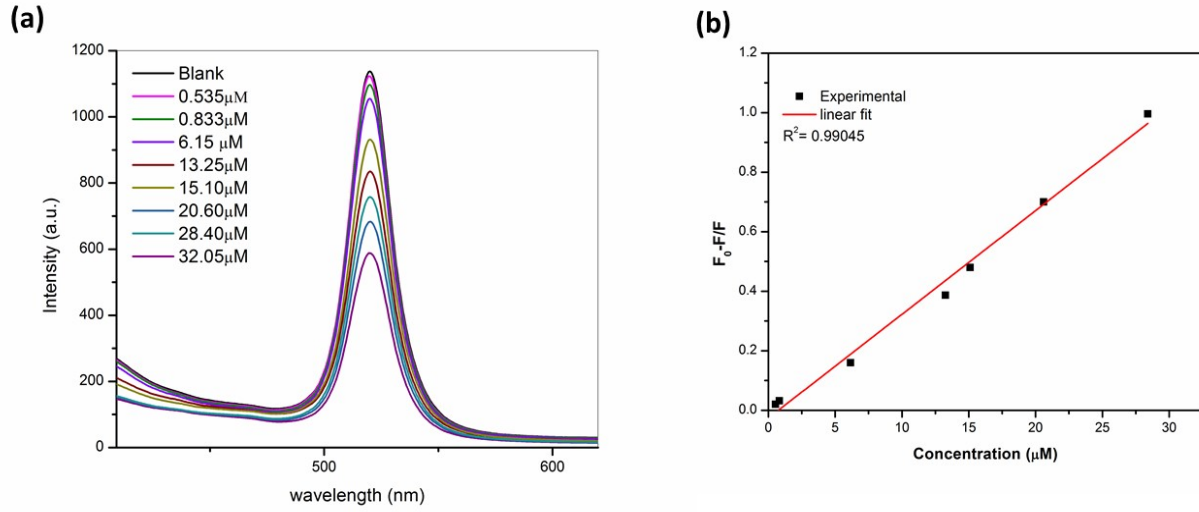

Figure S10

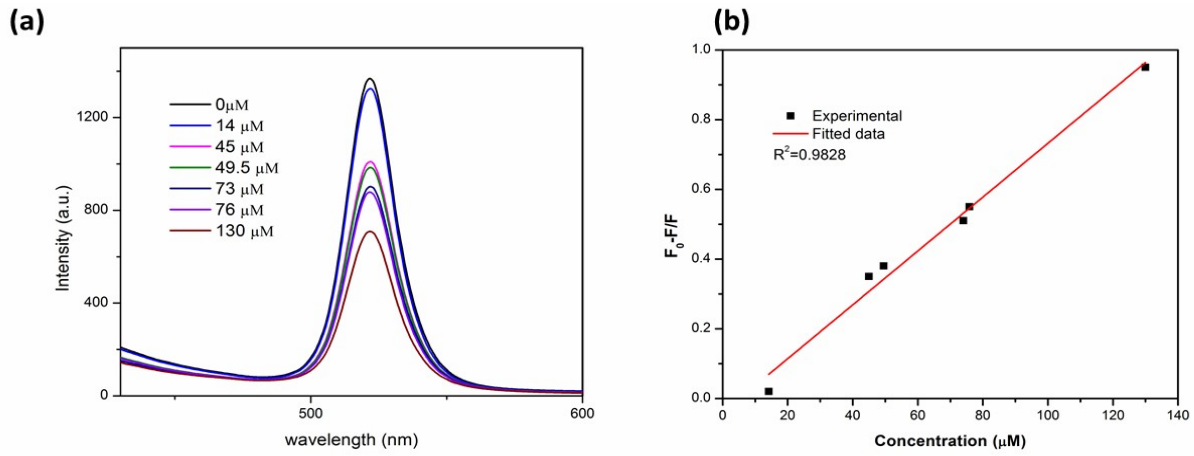

Figure S11

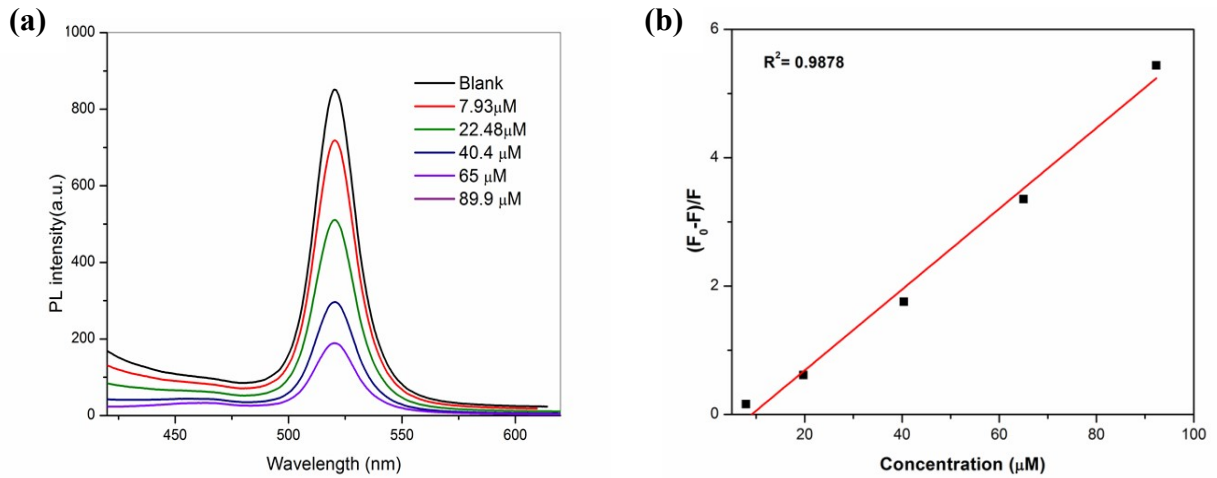

Figure S12

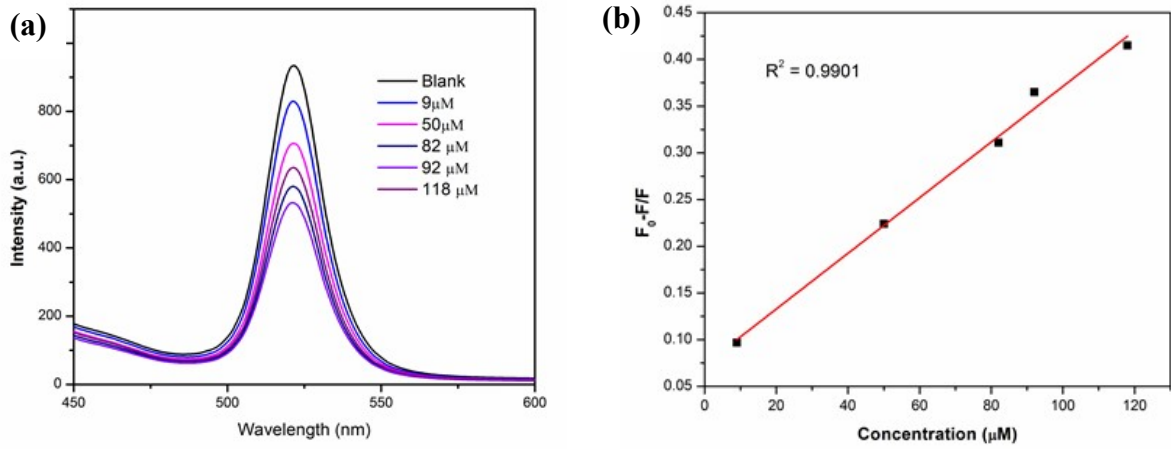

Figure S13

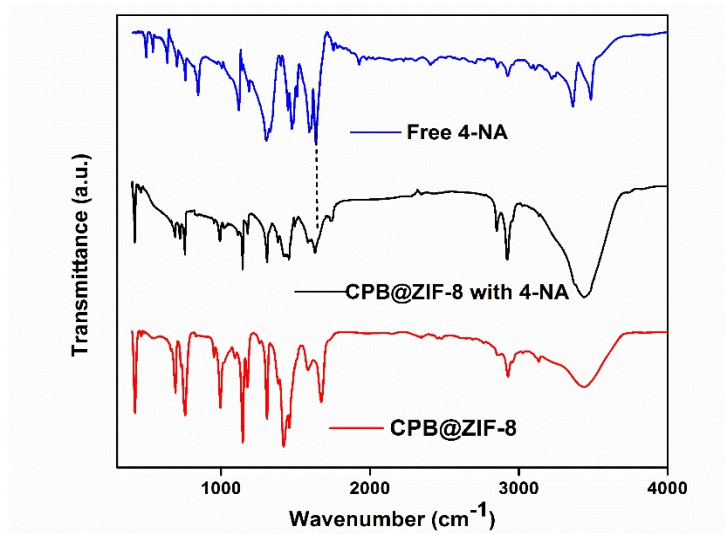

Figure S14

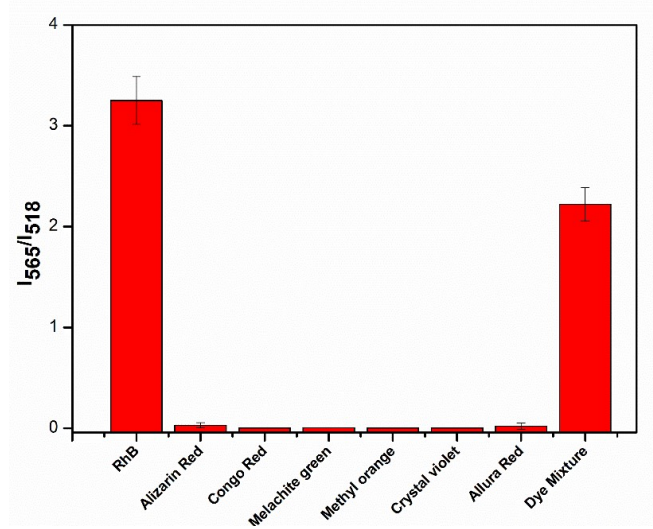



**Table S1:** Chemical stability study of CPB/ZIF-8 in different solvents.

**Percentage of retained emission intensity of CPB@ZIF-8**

| <b>Solvents</b>     | <b>Day 1</b> | <b>Day 2</b> | <b>Day 3</b> | <b>Day 4</b> | <b>Day 5</b> | <b>Day 6</b> | <b>Day 7</b> |
|---------------------|--------------|--------------|--------------|--------------|--------------|--------------|--------------|
| <b>Methanol</b>     | 98           | 95.33        | 88.85        | 84.30        | 81.77        | 80.52        | 75.08        |
| <b>Ethanol</b>      | 98.05        | 97.55        | 90.78        | 88.65        | 84.49        | 80.20        | 77.96        |
| <b>Butanol</b>      | 95.28        | 93.49        | 90.88        | 89.25        | 86.77        | 82.67        | 80.49        |
| <b>Isopropanol</b>  | 98.55        | 96.50        | 89.40        | 87.95        | 84.78        | 80           | 79.16        |
| <b>DMF</b>          | 93.33        | 88.10        | 85.40        | 81.07        | 78.85        | 76.22        | 72.5         |
| <b>DMSO</b>         | 91.05        | 87.06        | 83.47        | 79.28        | 76.9         | 72.3         | 65.80        |
| <b>Acetonitrile</b> | 96.70        | 91.04        | 86           | 82.59        | 79.20        | 74.60        | 70.35        |
| <b>NMP</b>          | 97.50        | 92.75        | 87.60        | 83.06        | 75.90        | 74           | 73           |
| <b>Water</b>        | 93.56        | 81.80        | 77.72        | 71.50        | 68           | 61.20        | 52           |

**Table S2:** Comparison of performance of CPB/ZIF-8 with previous literatures for 4-nitroaniline detection.

| Fluorescent System                                          | LOD (nM)                | $K_{sv}$                                                               | Linear range (M)                                         | Response time | Ref       |
|-------------------------------------------------------------|-------------------------|------------------------------------------------------------------------|----------------------------------------------------------|---------------|-----------|
| <b>N-doped carbon dots (Blue) Green</b>                     | 111.6 nM                | $1.4 \pm 0.2 \times 10^4 \text{ M}^{-1}$                               | 0 – 40 $\mu\text{M}$                                     | N/A           | 2         |
|                                                             | 68.9 nM                 | $2.9 \pm 0.1 \times 10^4 \text{ M}^{-1}$                               | 0– 50 $\mu\text{M}$                                      |               |           |
| <b>FJI-H26 MOF</b>                                          | 0.025 mM                | $4.1 \times 10^4 \text{ M}^{-1}$                                       | 0.005 – 0.025 mM                                         | N/A           | 3         |
| <b>Cd– PDA MOF</b>                                          | 25 nM                   | $4.07 \times 10^4 \text{ M}^{-1}$                                      | 0–10 $\mu\text{M}$                                       | N/A           | 4         |
| <b>Porous organic polymer (TPDC-DB)</b>                     | 455 ppb                 | $1.7 \times 10^4 \text{ M}^{-1}$                                       | N/A                                                      | N/A           | 5         |
| <b>Cd MOF</b>                                               | 0.52 ppm                | $9.8 \times 10^4 \text{ M}^{-1}$                                       | 0 – 0.0001 M                                             | 3 min         | 6         |
| <b>Triphenylamine functionalized sensor</b>                 | 724 nM (0.10 ppm)       | $2.28 \times 10^4 \text{ M}^{-1}$                                      | 0 – 40 $\mu\text{M}$                                     | 30 sec        | 7         |
| <b>1,2,3-triazolyl based conjugated microporous polymer</b> | 4.2 $\mu\text{M}$       | $7.08 \times 10^4 \text{ M}^{-1}$                                      | 0.5–4 $\mu\text{M}$                                      | N/ A          | 8         |
| <b>W-N-CDs and E-N-CDs</b>                                  | 1 and 0.1 $\mu\text{M}$ | $8.82 \times 10^3 \text{ M}^{-1}$<br>$1.25 \times 10^4 \text{ M}^{-1}$ | (0–1) $10^{-4} \text{ M}$<br>(0–0.8) $10^{-4} \text{ M}$ | N/ A          | 9         |
| <b>CsPbBr<sub>3</sub>@ZIF-8</b>                             | 60.58 nM (8.36 ppb)     | $5.942 \times 10^5 \text{ M}^{-1}$                                     | 0.368 – 51.5 $\mu\text{M}$                               | 25 sec        | This work |

**Table S3:** Comparison of quenching constant ( $K_{sv}$ ), LOD and, correlation values of different NACs analytes.

| Analytes                  | $K_{sv}$            | LOD           | Correlation coefficient ( $R^2$ ) |
|---------------------------|---------------------|---------------|-----------------------------------|
| <b>4-nitroaniline</b>     | $5.942 \times 10^5$ | 60.58 nM      | 0.99058                           |
| <b>2-nitroaniline</b>     | $7.73 \times 10^3$  | 0.176 $\mu$ M | 0.98280                           |
| <b>3-nitroaniline</b>     | $3.18 \times 10^3$  | 0.186 $\mu$ M | 0.9901                            |
| <b>2,4-dinitroaniline</b> | $3.48 \times 10^4$  | 0.120 $\mu$ M | 0.99045                           |
| <b>Picric acid</b>        | $6.52 \times 10^4$  | 0.137 $\mu$ M | 0.9878                            |

## References

1. Cui, W., Zhao, J., Wang, L., Lv, P., Li, X., Yin, Z., ... & Tang, A. (2022). Unraveling the Phase Transition and Luminescence Tuning of Pb-Free Cs–Cu–I Perovskites Enabled by Reaction Temperature and Polar Solvent. *The Journal of Physical Chemistry Letters*, 13(22), 4856-4863.
2. Nandi, N., Sarkar, P., & Sahu, K. (2021). N-doped carbon dots for visual recognition of 4-nitroaniline and use in fluorescent inks. *ACS Applied Nano Materials*, 4(9), 9616-9624.
3. Wu, D., Zhou, K., Tian, J., Liu, C., Jiang, F., Yuan, D., ... & Hong, M. (2020). A tubular luminescent framework: precise decoding of nitroaniline isomers and quantitative detection of traces of benzaldehyde in benzyl alcohol. *Journal of Materials Chemistry C*, 8(29), 9828-9835.
4. Wu, P., Liu, Y., Li, Y., Jiang, M., Li, X. L., Shi, Y., & Wang, J. (2016). A cadmium (ii)-based metal–organic framework for selective trace detection of nitroaniline isomers and photocatalytic degradation of methylene blue in neutral aqueous solution. *Journal of Materials Chemistry A*, 4(42), 16349-16355.

5. Deshmukh, A., Bandyopadhyay, S., James, A., & Patra, A. (2016). Trace level detection of nitroanilines using a solution processable fluorescent porous organic polymer. *Journal of Materials Chemistry C*, 4(20), 4427-4433.
6. Yang, Y. J., Wang, M. J., & Zhang, K. L. (2016). A novel photoluminescent Cd (II)–organic framework exhibiting rapid and efficient multi-responsive fluorescence sensing for trace amounts of Fe<sup>3+</sup> ions and some NACs, especially for 4-nitroaniline and 2-methyl-4-nitroaniline. *Journal of Materials Chemistry C*, 4(48), 11404-11418.
7. Ji, N. N., Shi, Z. Q., Hu, H. L., & Zheng, H. G. (2018). A triphenylamine-functionalized luminescent sensor for efficient p-nitroaniline detection. *Dalton Transactions*, 47(21), 7222-7228.
8. Wei, F., Cai, X., Nie, J., Wang, F., Lu, C., Yang, G., ... & Zhang, Y. (2018). A 1, 2, 3-triazolyl based conjugated microporous polymer for sensitive detection of p-nitroaniline and Au nanoparticle immobilization. *Polymer Chemistry*, 9(27), 3832-3839.
9. Yuan, H., Li, D., Liu, Y., Xu, X., & Xiong, C. (2015). Nitrogen-doped carbon dots from plant cytoplasm as selective and sensitive fluorescent probes for detecting p-nitroaniline in both aqueous and soil systems. *Analyst*, 140(5), 1428-1431.
